# Supplementary material for: OpenProt: a more comprehensive guide to explore eukaryotic coding potential and proteomes
Source: PubMed Central journal article supplement (PMC6323990; doi:10.1093/nar/gky936), 2018-10-09
Supplement: gky936_supplemental_files.pdf [file gky936_supplemental_files.pdf]

## SUPPORTING MATERIALS S1

### I. MS Spectra validation examples

#### (1) Novel Isoform with high MS score: **II\_794710**

**OpenProt** Browse Search Downloads About Help

---

**Genome**

Species: Homo sapiens | Assembly: GRCh38 p5 (GCA\_00001405.2) | Annotation: Ensembl+RefSeq (Ensembl GRC)

Gene: list of gene symbols | Transcript: list of transcript accessions | Protein: **II\_794710**  
list of protein accessions

**Advanced Search** (edit search criteria)

Show only proteins with experimental evidence |  Show only proteins detected by MS |  Show only proteins detected by ribosome profiling studies

Show only proteins with predicted domains |  Show only AIPots |  Show only isoforms

**Q search** 1 proteins found | Order by: MS Score (desc) / TE (desc) / | Column Settings | [download TSV](#) | [download FASTA](#) | [Share](#)

| Protein Accession? | Protein Types? | Protein length (a.a.) | kDa   | PI   | MS? | TE? | Domains? | Orthology Across 10 Species #   Species Names? | Species      | Gene  | Transcript Accession | Type | Localization? |                         |
|--------------------|----------------|-----------------------|-------|------|-----|-----|----------|------------------------------------------------|--------------|-------|----------------------|------|---------------|-------------------------|
| 1 II_794710        | Isoform        | 503                   | 64.27 | 9.28 | 10  | 0   | 16       | 8: SC DR NM RN DM <b>IT PT SA</b>              | Homo sapiens | FEXW4 | ENST00000331272      | mRNA | -             | <a href="#">details</a> |

From PeptideShaker, peptide from TCGA\_BRCA study (PMID: [27251275](#)).

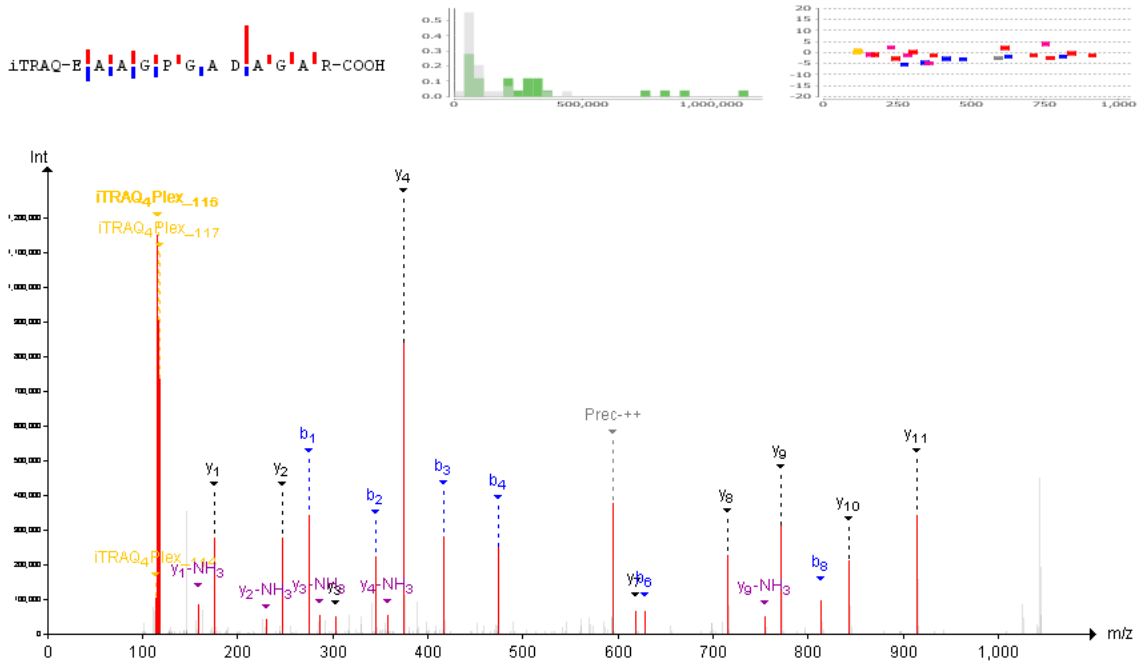

(2) Novel Isoform with low MS score: **II\_683445**

**OpenProt** Browse Search Downloads About Help

---

**Genome**

Species: Homo sapiens | Assembly: GRCh38.p5 (GCA\_000001405.20) | Annotation: Ensembl+RefSeq (Ensembl (GRC))

Gene: list of gene symbols | Transcript: list of transcript accessions | Protein: **II\_683445** (list of protein accessions)

**Advanced Search** (edit search criteria)

Show only proteins with experimental evidence |  Show only proteins detected by MS |  Show only proteins detected by ribosome profiling studies

Show only proteins with predicted domains |  Show only AIPProts |  Show only isoforms

Q Search: 1 proteins found | Order by: MS Score (desc) / TE (desc) / I | Column Settings | download as TSV | download as FASTA

| Protein Accession? | Protein Types? | Protein length (a.a.) | kDa   | pI   | Experimental Evidence |     | Functional Prediction |                                                | Species      | Gene  | Transcript Accession | Type  | Localization? |
|--------------------|----------------|-----------------------|-------|------|-----------------------|-----|-----------------------|------------------------------------------------|--------------|-------|----------------------|-------|---------------|
|                    |                |                       |       |      | MS?                   | TE? | Domains?              | Orthology Across 10 Species #   Species Names? |              |       |                      |       |               |
| 1 II_683445        | Isoform        | 166                   | 18.30 | 7.78 | 2                     | 0   | 7                     | 3: DR, RN, P1                                  | Homo sapiens | EIF3I | ENST00000474371      | ncRNA | -             |

From PeptideShaker, peptide from Bioplex study (PMID: [28514442](https://pubmed.ncbi.nlm.nih.gov/28514442/)).

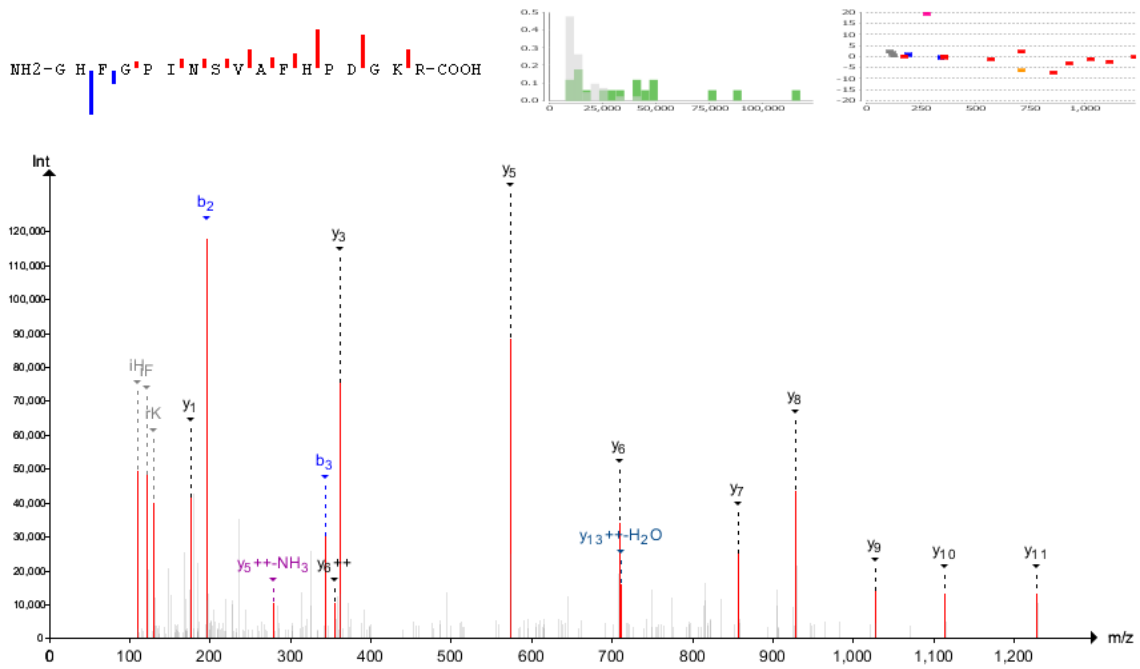

(3) Alternative Protein with high MS score: **IP\_079312**

**OpenProt** Browse Search Downloads About Help

---

Genome  
 Species: Human sapiens Assembly: GRCh38 p5 (GCA\_000001405.2) Annotation: Ensembl+RefSeq (Ensembl (GRC))

Gene: list of gene symbols Transcript: list of transcript accessions Protein: IP\_079312  
list of protein accessions

Advanced Search *(edit search criteria)*

Show only proteins with experimental evidence  Show only proteins detected by MS  Show only proteins detected by ribosome profiling studies

Show only proteins with predicted domains  Show only AltProts  Show only isoforms

Search: 1 proteins found Order by: MS Score (desc) / TE (desc) / I Column Settings download as TSV download as FAS/IA

| Protein Accession? | Protein Types? | Protein length (a.a.) | kDa   | pI   | Experimental Evidence |     | Functional Prediction |                                                | Species      | Gene    | Transcript Accession | Type | Localization? |                         |
|--------------------|----------------|-----------------------|-------|------|-----------------------|-----|-----------------------|------------------------------------------------|--------------|---------|----------------------|------|---------------|-------------------------|
|                    |                |                       |       |      | MS?                   | TE? | Domains?              | Orthology Across 10 Species #   Species Names? |              |         |                      |      |               |                         |
| 1 IP_079312        | AltProt        | 388                   | 42.34 | 5.71 | 72                    | 0   | 16                    | 9: SC DR MM RN DM CE BT PT OA                  | Homo sapiens | EDARADD | NM_060738.3          | mRNA | 3'UTR         | <a href="#">details</a> |
|                    |                |                       |       |      |                       |     |                       |                                                | Homo sapiens | EDARADD | ENST00000359362      | mRNA | 3'UTR         | <a href="#">details</a> |
|                    |                |                       |       |      |                       |     |                       |                                                | Homo sapiens | EDARADD | NM_145861.2          | mRNA | 3'UTR         | <a href="#">details</a> |

[show 1 more predictions of IP\\_079312.](#)

From PeptideShaker, peptide from Bioplex study (PMID: [26186194](#)).

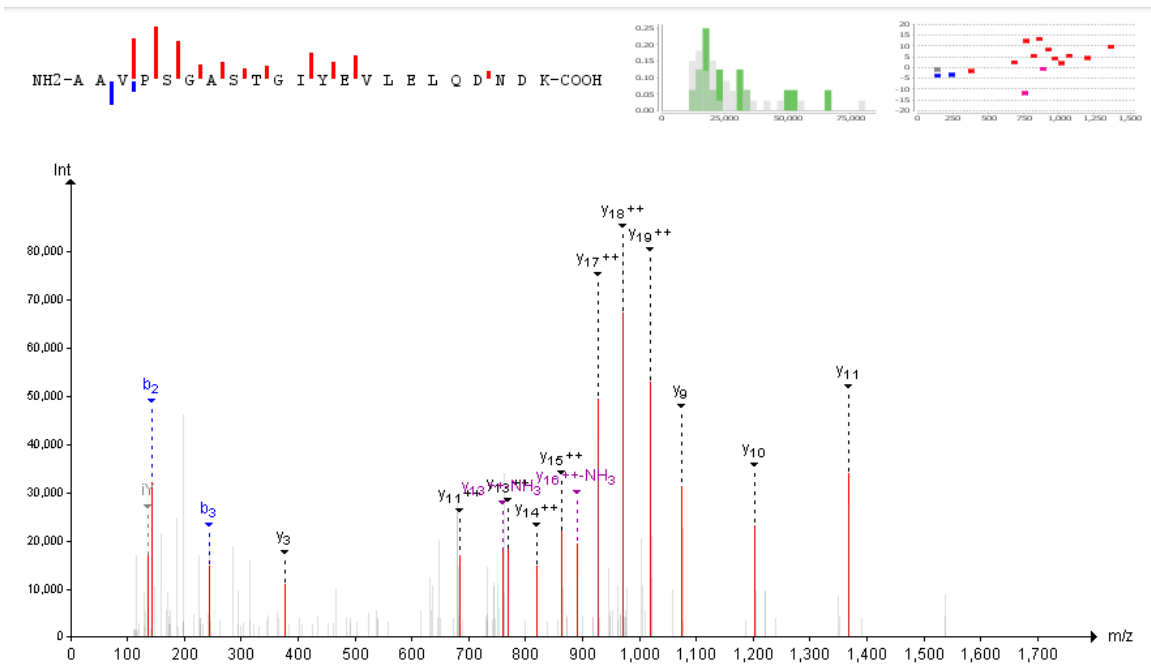

(4) Alternative Protein with low MS score: **IP\_130992**

**OpenProt** Browse Search Downloads About Help

---

**Genome**

Species: Homo sapiens | Assembly: GRCh38.p5 (GCA\_00001405.20) | Annotation: Ensembl+RefSeq (Ensembl (GRC))

Gene: list of gene symbols | Transcript: list of transcript accessions | Protein: **IP\_130992** (list of protein accessions)

**Advanced Search** (edit search criteria)

Show only proteins with experimental evidence   
 Show only proteins detected by MS   
 Show only proteins detected by ribosome profiling studies  
 Show only proteins with predicted domains   
 Show only AllProts   
 Show only isoforms

Q Search 1 proteins found | Order by: MS Score (desc) / TE (desc) / L | Column Settings | download as TSV | download as FASTA

| Protein Accession? | Protein Types? | Protein length (a.a.) | kDa  | pI   | MS? | TE? | Experimental Evidence |                                                | Functional Prediction |              | Species | Gene            | Transcript Accession | Type | Localization? |                         |
|--------------------|----------------|-----------------------|------|------|-----|-----|-----------------------|------------------------------------------------|-----------------------|--------------|---------|-----------------|----------------------|------|---------------|-------------------------|
|                    |                |                       |      |      |     |     | Domains?              | Orthology Across 10 Species #   Species Names? |                       |              |         |                 |                      |      |               |                         |
| 1 IP_130992        | AllProt        | 80                    | 9.56 | 9.73 | 2   | 0   | 6                     | 1                                              | P1                    | Homo sapiens | IL9     | NM_000590.1     | mRNA                 | CDS  |               | <a href="#">details</a> |
|                    |                |                       |      |      |     |     |                       |                                                |                       | Homo sapiens | IL9     | ENST00000274520 | mRNA                 | CDS  |               | <a href="#">details</a> |

From PeptideShaker, peptide from TCGA\_BRCA study (PMID: [27251275](#)).

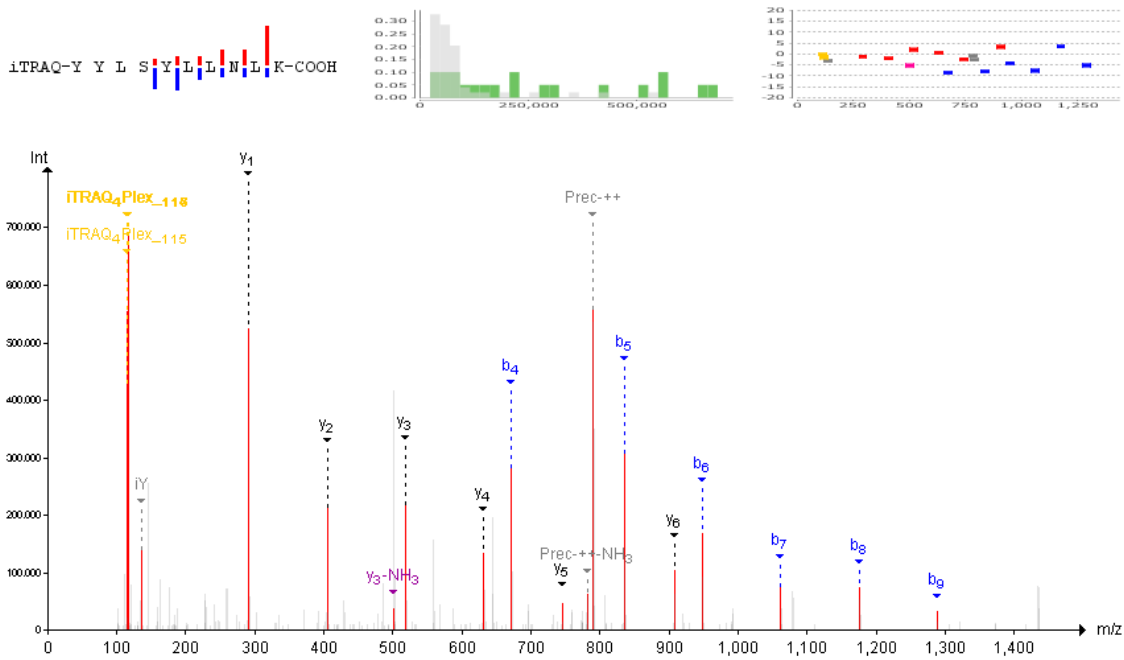

## II. MS pipeline additional information

Once downloaded from ProteomeXchange [31], PRIDE archive [32] and collaborators, original RAW files are converted to mzXML. This conversion is done using ProteoWizard (version 3.0.8789). The converted files can then be analysed on the mp2 supercomputer (Calcul Québec, Calcul Canada) in a linux environment (CentOS 6.8). This computer of 1632 nodes of 24 cores each allows rapid re-analysis of large datasets.

## III. Help Materials for mass spectrometry identifications

- [How is the MS score calculated?](#)
- [How does OpenProt identify AltProts in MS-based proteomic analyses?](#)
- [How is the increase in the database search space accounted for?](#)
- [How does OpenProt deal with comparability and reliability across MS datasets?](#)
- [I have some MS datasets I would like to re-analyze using OpenProt, what should I do?](#)
- [I have MS datasets that I would like to share with OpenProt, how can I do so?](#)
- [I have an RNA-seq dataset and would like to download a custom fasta with OpenProt, how can I do so?](#)
- [Where can I find a list of MS experiments re-analyzed by OpenProt?](#)
- [Where can I find a link to a specific study my protein of interest was detected in?](#)
- [Peptide assignation across isoforms: what are the rules?](#)
- [Can proteins coded by RNAs currently annotated as non-coding \(pseudogenes RNAs and lncRNAs\) be detected?](#)
- [MS detection truths: recommendations](#)

### How is the MS score calculated?

The Mass spectrometry score (MS score) is the **sum of unique peptides identified** per MS-studies reanalyzed by OpenProt.

In order to be annotated as detected by MS, several criteria have to be met:

**(1)** Only unassigned peptides from MS data can be matched to AltProts. If a peptide matches both a RefProt and an AltProt, the corresponding Peptide Spectrum Match (PSM) will be assigned to the RefProt only. *For more information on the MS annotation pipeline enforced by OpenProt, see [below](#). For more information on peptide assignation rules, click [here](#).*

**(2)** An AltProt or Isoform must have been seen with at least one unique peptide.

As such, if an AltProt is detected by one unique peptide in three different MS datasets, and two different unique peptides in one other MS study, the corresponding MS score is 5 (1+1+1+2).

[Back](#)

### How does OpenProt identify AltProts in MS-based proteomic analyses?

OpenProt retrieves MS raw data files from ProteomeXchange [31], PRIDE archive [32] and collaborators. Each MS data file is then analysed using the same pipeline, a stringent **FDR of 0.001%** is enforced. Traditionally, a 1% FDR is used; we chose a more stringent FDR to focus on high quality AltProt identifications only. The decoy database contains the reversed sequences of proteins from the target database. All peptide sequences identified for a protein (RefProt, Isoform or AltProt) can be seen under the **details** tab.

The screenshot shows the OpenProt search interface. At the top, there are navigation links: Browse, Search, Downloads, About, Help. Below that, search filters are set for Species: Homo sapiens, Assembly: GRCh38.p5 (GCA\_000001405.20), and Annotation: Ensembl-RefSeq (Ensembl (GRC)). The Gene filter is set to ENO1P1. The search results show 6 proteins found, sorted by MS Score (desc) / TE (desc). The table includes columns for Protein Accession, Protein Types, Protein length (a.a.), kDa, pI, MS?, TE?, Domains?, Orthology Across 10 Species, Species, Gene, Transcript Accession, Type, and Localization?. A red circle highlights the 'details' link in the Localization? column of the first row.

| Protein Accession? | Protein Types? | Protein length (a.a.) | kDa   | pI    | MS? | TE? | Domains? | Orthology Across 10 Species<br>#   Species Names? | Species      | Gene   | Transcript Accession | Type  | Localization?             |
|--------------------|----------------|-----------------------|-------|-------|-----|-----|----------|---------------------------------------------------|--------------|--------|----------------------|-------|---------------------------|
|                    |                |                       |       |       |     |     |          |                                                   |              |        |                      |       |                           |
| 1 IP_079312        | AltProt        | 388                   | 42.34 | 5.71  | 72  | 0   | 16       | 9<br>SC DR MM RN DM CE BT PT OA                   | Homo sapiens | ENO1P1 | ENST00000396587      | ncRNA | - <a href="#">details</a> |
| 2 IP_079314        | AltProt        | 40                    | 4.25  | 9.82  | 0   | 0   | 5        | 4<br>DR MM RN PT                                  | Homo sapiens | ENO1P1 | ENST00000396587      | ncRNA | - <a href="#">details</a> |
| 3 IP_079313        | AltProt        | 30                    | 3.46  | 12.81 | 0   | 0   | 0        | 5<br>MM RN BT PT OA                               | Homo sapiens | ENO1P1 | ENST00000396587      | ncRNA | - <a href="#">details</a> |
| 4 IP_079315        | AltProt        | 33                    | 3.89  | 12.1  | 0   | 0   | 0        | 3<br>DR BT PT                                     | Homo sapiens | ENO1P1 | ENST00000396587      | ncRNA | - <a href="#">details</a> |
| 5 IP_079318        | AltProt        | 94                    | 10.44 | 9.3   | 0   | 0   | 0        | 4<br>DR MM BT PT                                  | Homo sapiens | ENO1P1 | ENST00000396587      | ncRNA | - <a href="#">details</a> |
| 6 IP_079319        | AltProt        | 58                    | 6.47  | 10.76 | 0   | 0   | 0        | 5<br>MM RN BT PT OA                               | Homo sapiens | ENO1P1 | ENST00000396587      | ncRNA | - <a href="#">details</a> |

Then you can click on the **Mass Spectrometry** tab to display details about evidence of expression from MS datasets.

OpenProt Browse Search Downloads About Help

back to main table

IP\_079312 4

Info Mass spectrometry (72) Translation (none) Domains (16) Conservation (9)

| Study <span style="margin-left: 10px;">1</span>                                                                       | peptide <span style="margin-left: 10px;">2</span> | match count <span style="margin-left: 10px;">3</span> |
|-----------------------------------------------------------------------------------------------------------------------|---------------------------------------------------|-------------------------------------------------------|
| <b>BioPlex_1.0</b><br><a href="http://bioplex.hms.harvard.edu/">http://bioplex.hms.harvard.edu/</a><br>PMID: 26186194 | 1 AAVPSGASTGIYEVLELQ                              | 41                                                    |
|                                                                                                                       | 2 NQIRSVTESLQACK                                  | 4                                                     |
|                                                                                                                       | 3 AAVPSGASTGIYEVLELQDNDK                          | 93                                                    |
|                                                                                                                       | 4 AAVPSGASTGIYEVLELQDNDKTR                        | 26                                                    |
|                                                                                                                       | 5 LAMQEFMVLPGGAANFR                               | 6                                                     |
|                                                                                                                       | 6 FTASAGIQVVEDDLRVNTP                             | 1                                                     |
| <b>BioPlex_2.0</b><br><a href="http://bioplex.hms.harvard.edu/">http://bioplex.hms.harvard.edu/</a><br>PMID: 28514442 | 7 AAVPSGASTGIYEVLELQDNDK                          | 70                                                    |
|                                                                                                                       | 8 AAVPSGASTGIYEVLELQDNDKTR                        | 15                                                    |
|                                                                                                                       | 9 AAVPSGASTGIYEVLELQ                              | 35                                                    |
|                                                                                                                       | 10 LAMQEFMVLPGGAANFR                              | 2                                                     |
|                                                                                                                       | 11 NQIRSVTESLQACK                                 | 38                                                    |
| <b>ID1043_ChorusProject</b><br><a href="https://chorusproject.org">https://chorusproject.org</a><br>PMID: 27499296    | 12 AAVPSGASTGIYEVLELQDNDK                         | 1                                                     |
|                                                                                                                       | 13 NQIRSVTESLQACK                                 | 1                                                     |
|                                                                                                                       | 14 AAVPSGASTGIYEVLELQ                             | 1                                                     |

In the first column, you will find the **name of the study** analysed (1), along with a link and the reference. For each study, you will find in the second column the list of **identified peptides** (2), and the third column indicates the number of **peptide spectrum matches** (3). Finally, next to the tab title (4), the number between brackets refers to the overall **MS score**, as explained [here](#).

[Back](#)

### How is the increase in the database search space accounted for?

Adding all predicted AltProts and novel Isoforms to the database corresponds to an additional 516,515 entries in Human alone, leading to a substantial increase in the search space. Thus, OpenProt enforces a **stringent FDR of 0.001 %** (traditionally, set at 1 %), in order to focus on highly confident AltProts and Novel Isoforms identifications, and to account for the database increased size. This strategy was designed with the kind help of Peptide Shaker developers, initial validations included: (a) a minimum of 80% overlap of RefProts identifications with the original MS study; and (b) a manual validation of randomly selected spectra.

[Back](#)

### How does OpenProt deal with comparability and reliability across MS datasets?

OpenProt pipeline retrieves publicly available top-down MS/MS datasets mostly from PRIDE and ProteomeXchange. That ensures datasets have been run through the PRIDE Inspector to assess data quality (PMID [22318026](#)) and that they follow the ProteomeXchange consortium guidelines (PMID [27924013](#)). Moreover, for each retrieved dataset, parameters are validated through text-

mining and manual curation. As such, OpenProt ensures to analyze data from high quality mass spectrometers and to do so with the appropriate parameters. Although this step is time consuming, it guarantees higher quality data and reliability on OpenProt.

[Back](#)

### I have some MS datasets I would like to re-analyze using OpenProt, what should I do?

All data on OpenProt is freely available and downloadable. You can thus download custom fasta files to analyze your MS datasets. For more information on downloads, click [here](#). For more information on which database to download, click [here](#).

[Back](#)

### I have MS datasets that I would like to share with OpenProt, how can I do so?

We are constantly adding datasets to the OpenProt database. If you have some you would be willing to share with us, you can contact us [here](#).

[Back](#)

### I have an RNA-seq dataset and would like to download a custom fasta with OpenProt, how can I do so?

OpenProt allows the download of custom database to couple MS studies with RNA-seq experiments for example. Under the search page, you enter your list of transcripts (1) - or your list of genes (1) - and click on search (2). This will display your table of results, and you can then download these as a fasta file (3).

The screenshot shows the OpenProt search interface. At the top, there are navigation links: Browse, Search, Downloads, About, Help. Below this, there are search filters for Species (Homo sapiens), Assembly (GRCh38 p5 (GCA\_000001405.20)), and Annotation (Ensembl-RefSeq (Ensembl) (GRC)). A search box contains the number 1. Below the search box, there are advanced search options: Show only proteins with experimental evidence, Show only proteins detected by MS, Show only proteins with predicted domains, Show only AllProts, and Show only Isoforms. A search button with the number 2 is visible. Below the search options, there is a table of results with 36 proteins found. The table has columns for Protein Accession, Protein Types, Protein length (a.a.), kDa, pI, MS?, TIS?, Domains?, Orthology Across 10 Species, Species, Gene, Transcript Accession, Type, and Localization?. The table lists 5 proteins with their respective details. A download button with the number 3 is visible at the bottom right of the table.

| Protein Accession?  | Protein Types? | Protein length (a.a.) | kDa    | pI   | MS? | TIS? | Domains? | Orthology Across 10 Species   | Species      | Gene   | Transcript Accession | Type | Localization? |
|---------------------|----------------|-----------------------|--------|------|-----|------|----------|-------------------------------|--------------|--------|----------------------|------|---------------|
| 1 ENSP0000038065    | RefProt        | 260                   | 27.87  | 6.95 | 525 | 0    | 14       | 9: SC DR MM RN DM CE BT PT CA | Homo sapiens | GAPDH  | ENST00000396856      | mRNA | -             |
| 2 ENSP00000339001   | RefProt        | 444                   | 49.67  | 4.52 | 97  | 17   | 36       | 9: SC DR MM RN DM CE BT PT CA | Homo sapiens | TUBB   | ENST00000327892      | mRNA | -             |
| 3 NP_01705.2 Q96G01 | RefProt        | 975                   | 110.75 | 5.59 | 96  | 0    | 11       | 8: DR MM RN DM CE BT PT CA    | Homo sapiens | BICD1  | NM_001714.2          | mRNA | -             |
| 4 XP_011519117.1    | RefProt        | 937                   | 107.03 | 5.54 | 96  | 0    | 11       | 8: DR MM RN DM CE BT PT CA    | Homo sapiens | BICD1  | NM_001714.2          | mRNA | -             |
| 5 NP_073153.1       | RefProt        | 1944                  | 216.50 | 6.27 | 93  | 6    | 8        | 8: DR MM RN DM CE BT PT CA    | Homo sapiens | ANAPC1 | NM_022662.3          | mRNA | -             |

For more information on the fasta header, click [here](#).



**Nota bene:** For the moment, there is a limit at 2,000 gene / transcript entries at a time. However, you can download it as several fasta files and then concatenate them; or download all sequences in the [Downloads](#) section and filter by your genes / transcripts of interest.

[Back](#)

### Where can I find a list of MS experiments re-analyzed by OpenProt?

A full list of mass spectrometry studies added to the OpenProt database can be found [here](#).

[Back](#)

### Where can I find a link to a specific study my protein of interest was detected in?

Under the Details page of a specific protein, you can click on the Mass Spectrometry tab (1). The first column (2) contains the details about each specific study. It notably contains a link to the data (3) and the Pubmed ID to the related publication (4).

| Study                                                                                                                 | peptide                    | match count |
|-----------------------------------------------------------------------------------------------------------------------|----------------------------|-------------|
| <b>BioPlex_1.0</b><br><a href="http://bioplex.hms.harvard.edu/">http://bioplex.hms.harvard.edu/</a><br>PMID: 26186194 | 1 AAVPSGASTGIYEVLELQ       | 41          |
|                                                                                                                       | 2 NQIRSVTESLQACK           | 4           |
|                                                                                                                       | 3 AAVPSGASTGIYEVLELQDNDK   | 93          |
|                                                                                                                       | 4 AAVPSGASTGIYEVLELQDNDKTR | 26          |
|                                                                                                                       | 5 LAMQEFMVLVPGAANFR        | 6           |
|                                                                                                                       | 6 FTASAGIQWEDDLRVTNP       | 1           |
| <b>BioPlex_2.0</b><br><a href="http://bioplex.hms.harvard.edu/">http://bioplex.hms.harvard.edu/</a><br>PMID: 28514442 | 7 AAVPSGASTGIYEVLELQDNDK   | 70          |
|                                                                                                                       | 8 AAVPSGASTGIYEVLELQDNDKTR | 15          |
|                                                                                                                       | 9 AAVPSGASTGIYEVLELQ       | 35          |
|                                                                                                                       | 10 LAMQEFMVLVPGAANFR       | 2           |
|                                                                                                                       | 11 NQIRSVTESLQACK          | 38          |
| <b>ID1043_ChorusProject</b><br><a href="https://chorusproject.org">https://chorusproject.org</a><br>PMID: 27499296    | 12 AAVPSGASTGIYEVLELQDNDK  | 1           |
|                                                                                                                       | 13 NQIRSVTESLQACK          | 1           |
|                                                                                                                       | 14 AAVPSGASTGIYEVLELQ      | 1           |

[Back](#)

### Peptide assignment across isoforms: what are the rules?

In the case of two possible assignments on **different genes**, the peptide is **unassigned**.  
 In the case of two possible assignments **from the same gene**, the rules are detailed below for every encountered combination:

- a. If a **RefProt** is amongst the possible assignments, the peptide will **always be assigned to the RefProt**.
- b. Assignment possible to **two RefProts**, the peptide is assigned to **both**
- c. Assignment possible to **two Novel Isoforms** (II\_), the peptide is assigned to **both**.
- d. Assignment possible to **two AltProts** (IP\_), the peptide is assigned to **both**.
- e. Assignment possible to a **Novel Isoform** (II\_) and an **AltProt** (IP\_), the peptide is assigned to **both**.

Therefore, when a Novel Isoform (II\_) or AltProt (IP\_) is detected by MS, it is necessarily with a specific peptide that doesn't match the associated RefProt or any other RefProt. **Nota bene:** rules (a) to (e) only apply when assignments refer to different proteins **from the same gene**. If it is a different gene, the peptide is unassigned.

[Back](#)

### **Can proteins coded by RNAs currently annotated as non-coding (pseudogenes RNAs and lncRNAs) be detected?**

OpenProt annotates all ORFs (starting with an ATG and longer than 30 codons) and the corresponding AltProts in coding and non-coding RNAs. If non-coding derived AltProts have characteristics that allow detection by MS, then they can be detected. *For more information on MS detection for novel proteins, click [here](#).*

[Back](#)

### **MS detection truths: recommendations**

One has to always remember that a vast majority of MS datasets re-analyzed by OpenProt uses a trypsin digestion. Thus, **some proteins may not be detectable** under these conditions. An absence of detection does not mean the protein does not exist.

Moreover, AltProts are mostly **small proteins** (median length of 45 amino acids) which decrease the likelihood of detectable, sufficiently long, unique peptides. Furthermore, some protocols may be in favor of large and abundant proteins, when small proteins detection might require specific protocols (see [Ma et al., Anal Chem, 2016](#)).

Finally, Novel Isoforms or AltProts might not be identifiable using our OpenProt pipeline if no tryptic peptides permits a **unique assignment**. Indeed, when a peptide can also be assigned to a RefProt, it will always be assigned to the RefProt (see [peptide assignment rules](#)).

[Back](#)

## SUPPORTING MATERIALS S2

### Help Materials for translation events (TE) identification

- [What does TE and TIS mean?](#)
- [What is the TE score?](#)
- [What does PRICE do?](#)
- [How are translation event detection displayed on OpenProt?](#)
- [How should I interpret the p-value?](#)
- [How are multi-mapped reads accounted for?](#)
- [Where can I find a list of ribosome profiling studies analyzed by OpenProt?](#)
- [Where can I find a link to a specific study my protein of interest was detected in?](#)
- [Can the translation of pseudogenes be detected?](#)
- [I have ribosome profiling datasets that I would like to share with OpenProt, how can I do so?](#)
- [TE \(Translation Events\) detection truths: recommendations](#)

#### **What does TE and TIS mean?**

TE stands for Translation Event, when TIS stands for Translation Initiation Sites.

[Back](#)

#### **What is the TE score?**

The TE score displayed on the search results page and on the Translation tab corresponds to the **number of studies in which a significant identification was made**. For more information on translation events identification, see [below](#).

[Back](#)

#### **What does PRICE do?**

PRICE is an entropy based model for **identification of translated Open Reading Frames** (ORFs) from ribosome profiling datasets. It stands for **PR**obabilistic Inference of **C**odon activities by an **EM** algorithm (see PMID [29529017](#)). PRICE uses parameters inferred from well-translated, annotated ORFs to model the stochastic events in ribosome profiling. In brief, a given codon in a

ribosomal P site can produce several footprints, PRICE uses Maximum Likelihood algorithms to reconstitute the set of codons more likely to give the observed reads. The set of codons are then assembled in ORF candidates, where a machine-learning algorithm predicts the start codon. Detected ORFs are then filtered according to a stringent **FDR of 1%** (traditionally set at 10%) to focus on highly confident translation event. *For more information on the PRICE algorithm, see PMID [29529017](https://pubmed.ncbi.nlm.nih.gov/29529017/).*

[Back](#)

## How are translation event detection displayed on OpenProt?

PRICE results are crossed against OpenProt database. Results summary can be visualized in the TE (Translation Event) column from the main results table (1). The detailed results can be seen by clicking on the **details** tab.

The screenshot shows the OpenProt search interface. At the top, there are navigation links: Browse, Search, Downloads, About, Help. Below that, search filters are set for Species: Homo sapiens, Assembly: GRCh38 p5 (GCA\_00001405.20), and Annotation: Ensembl+RefSeq (Ensembl (GRC)). The search results show 23 proteins found, ordered by TE (desc) / MS Score (desc). The table below shows the results for LORBF8 and a protein with multiple XP accessions.

| Protein Accession?                                                                                        | Protein Types? | Protein length (a.a.) | kDa   | pI    | MS? | TE? | Experimental Evidence |    | Functional Prediction |    | Species | Gene | Transcript Accession | Type | Localization |
|-----------------------------------------------------------------------------------------------------------|----------------|-----------------------|-------|-------|-----|-----|-----------------------|----|-----------------------|----|---------|------|----------------------|------|--------------|
|                                                                                                           |                |                       |       |       |     |     | DR                    | MS | RN                    | DM |         |      |                      |      |              |
| 1 LORBF8                                                                                                  | RefProt        | 70                    | 8.44  | 11.14 | 34  | 18  | 4                     | 7  | DR                    | MM | RN      | DM   | BT                   | OA   | details      |
| 2 XP_016884327.1 ENSP00000327124 NP_061681.2 XP_011528538.1 ENSP00000385191 XP_011528540.1 XP_011528539.1 | RefProt        | 463                   | 51.29 | 7.73  | 48  | 8   | 7                     | 6  | DR                    | MM | RN      | BT   | BT                   | OA   | details      |

From the details page, you can click on the **Translation** evidence tab.

[back to main table](#)

LOR8F8

Info [Mass spectrometry \(37\)](#) **Translation (18)** [Domains \(4\)](#) [Conservation \(7\)](#)

« Homo sapiens / GRCh38.p5 chr22:39,499,231..39,509,443 »

Powered by [Biodalliance](#)

■ Transcript 
 ■ RefProt 
 ■ AltProt 
 ■ Isoform 
 ■ RefProt peptide match 
 ■ AltProt peptide match 
 ■ Isoform peptide match

| Update browser                   | Gene  | Annotation | Genomic coordinates  | Strand | Transcript      | Type | ORF informations |         |                |                | Sequences                |                      |                      |
|----------------------------------|-------|------------|----------------------|--------|-----------------|------|------------------|---------|----------------|----------------|--------------------------|----------------------|----------------------|
|                                  |       |            |                      |        |                 |      | Frame ?          | Kozak ? | High-eff. TIS? | Localization ? | Transcript coordinates ? | Protein              | DNA                  |
| <input checked="" type="radio"/> | MIEF1 | GRCh38.83  | 22:39504231-39504443 | +      | ENST00000325301 | mRNA | 3                | -       | -              | -              | 114-327                  | <a href="#">show</a> | <a href="#">show</a> |
| <input type="radio"/>            | MIEF1 | GRCh38.83  | 22:39504231-39504443 | +      | ENST00000404569 | mRNA | 3                | -       | -              | -              | 90-303                   | <a href="#">show</a> | <a href="#">show</a> |
| <input type="radio"/>            | MIEF1 | GRCh38.83  | 22:39504231-39504443 | +      | ENST00000434364 | mRNA | 3                | -       | -              | -              | 72-285                   | <a href="#">show</a> | <a href="#">show</a> |
| <input type="radio"/>            | MIEF1 | GRCh38.p7  | 22:39504231-39504443 | +      | NM_001304564.1  | mRNA | 1                | -       | -              | -              | 187-400                  | <a href="#">show</a> | <a href="#">show</a> |
| <input type="radio"/>            | MIEF1 | GRCh38.83  | 22:39504231-39504443 | +      | ENST00000428069 | mRNA | 1                | -       | -              | -              | 70-283                   | <a href="#">show</a> | <a href="#">show</a> |

Under the Translation tab, you will find a table with all the studies in which this ORF has been detected (1). The detections will be separated based on the annotations (RefSeq, 1; or Ensembl, 2).

[back to main table](#)

LOR8F8

Info [Mass spectrometry \(37\)](#) **Translation (18)** [Domains \(4\)](#) [Conservation \(7\)](#)

| study   | annotation source | location             | codon type | start score | rangescore | pvalue | samples (name: readcount)                                                                                                                                                                                                                                                                                                                                                                                                                                                                                                                                                                                                                                                                           | total readcount | transcript,protein,overlap  |
|---------|-------------------|----------------------|------------|-------------|------------|--------|-----------------------------------------------------------------------------------------------------------------------------------------------------------------------------------------------------------------------------------------------------------------------------------------------------------------------------------------------------------------------------------------------------------------------------------------------------------------------------------------------------------------------------------------------------------------------------------------------------------------------------------------------------------------------------------------------------|-----------------|-----------------------------|
| jl_2015 | RefSeq            | 22+39504230-39504443 | ATG uORF   | 0.52        | 0.85       | 0      | ERSrc:TAM00hr_chx_rep1.13.9<br>ERSrc:TAM01hr_chx_rep1.14.9<br>ERSrc:TAM04hr_chx_rep1.20.6<br>ERSrc:TAM24hr_chx_rep1.13.7<br>ERSrc:TAM00hr_harr_rep1.2.0<br>ERSrc:TAM01hr_harr_rep1.2.0<br>ERSrc:TAM04hr_harr_rep1.0.0<br>ERSrc:TAM24hr_harr_rep1.0.7<br>ERSrc:EIOH01hr_chx_rep2.36.5<br>ERSrc:EIOH04hr_chx_rep2.21.5<br>ERSrc:EIOH24hr_chx_rep2.30.5<br>ERSrc:TAM01hr_chx_rep2.11.0<br>ERSrc:TAM04hr_chx_rep2.25.6<br>ERSrc:TAM24hr_chx_rep2.28.8<br>EH_chx_rep1.7.9<br>EL_chx_rep1.16.7<br>ELR_chx_rep1.12.5<br>EH_harr_rep1.1.0<br>EL_harr_rep1.2.0<br>ELR_harr_rep1.1.2<br>EH_chx_rep2.6.3<br>EL_chx_rep2.19.7<br>ELR_chx_rep2.20.0<br>EH_harr_rep2.2.0<br>EL_harr_rep2.1.6<br>ELR_harr_rep2.6.1 | 316.5           | NM_019008.5.LOR8F8:100%     |
|         | Ensembl           | 22+39504230-39504443 | ATG uORF   | 0.44        | 0.88       | 0      | ERSrc:TAM00hr_chx_rep1.13.9<br>ERSrc:TAM01hr_chx_rep1.14.9<br>ERSrc:TAM04hr_chx_rep1.20.5                                                                                                                                                                                                                                                                                                                                                                                                                                                                                                                                                                                                           | 316.4           | ENST00000325301.LOR8F8:100% |

[Contact us](#)

The third column corresponds to the genomic coordinates of the detected ORF (2), followed by the start codon and type of ORF (3). The p-value corresponds to the ORF identification confidence

(4, for more information on the p-value, click [here](#)). The samples column (5) lists all samples within an experiment with the associated readcount for this ORF. The last column (6) corresponds to the transcript and associated protein accessions followed by the overlap of the PRICE predicted ORF sequence with the OpenProt predicted ORF sequence.

[Back](#)

### How should I interpret the p-value?

The p-value associated to an ORF detection corresponds to the significance of a generalized binomial test (not corrected for multiple comparisons). In brief, it indicates the **confidence of that ORF not being attributable to noise**. In ribosome profiling experiments, noise can arise from (1) ribosomal scanning, (2) abortive translation events in the leader region, (3) non-ribosome mediated mRNA protection from RNAses, or (4) overlapping ORFs. **Nota bene:** this p-value indicate the confidence of the ORF identification, not the confidence of its detection which would be represented by the enforced 1% FDR (see [above](#)).

[Back](#)

### How are multi-mapped reads accounted for?

We run PRICE using the “rescue” mode. This means that if a footprint maps at several places in the genome, the read is either **fractionated or rescued** if uniquely mapped reads nearby allow confident identification of the footprint genomic coordinates.

[Back](#)

### Where can I find a list of ribosome profiling studies analyzed by OpenProt?

A list of ribosome profiling studies analyzed by OpenProt can be found [here](#).

[Back](#)

### Where can I find a link to a specific study my protein of interest was detected in?

Under the Details page of a specific protein, you can click on the Translation tab (1). The first column (2) contains the details about each specific study. The name of the study (3) is a link to the original study.

OpenProt Browse Search Downloads About Help

back to main table

LOR8F8

Info Mass spectrometry (37) Translation (16) Domains (4) Conservation (7)

| study   | annotation source | location             | codon | type | start score | rangescore | pvalue | samples (name: readcount)                                                                                                                                                                                                                                                                                                                                                                                                                                                                                                                                                                                                                                                             | total readcount | transcript,protein,overlap  |
|---------|-------------------|----------------------|-------|------|-------------|------------|--------|---------------------------------------------------------------------------------------------------------------------------------------------------------------------------------------------------------------------------------------------------------------------------------------------------------------------------------------------------------------------------------------------------------------------------------------------------------------------------------------------------------------------------------------------------------------------------------------------------------------------------------------------------------------------------------------|-----------------|-----------------------------|
| ji_2015 | RefSeq            | 22+39504230-39504443 | ATG   | uORF | 0.52        | 0.85       | 0      | ERSrcTAM00hr_chx_rep1:13.9<br>ERSrcTAM01hr_chx_rep1:14.9<br>ERSrcTAM04hr_chx_rep1:20.6<br>ERSrcTAM24hr_chx_rep1:13.7<br>ERSrcTAM00hr_harr_rep1:2.0<br>ERSrcTAM01hr_harr_rep1:2.0<br>ERSrcTAM04hr_harr_rep1:0.0<br>ERSrcTAM24hr_harr_rep1:0.7<br>ERSrcEIOH01hr_chx_rep2:36.5<br>ERSrcEIOH04hr_chx_rep2:21.5<br>ERSrcEIOH24hr_chx_rep2:30.5<br>ERSrcTAM01hr_chx_rep2:11.0<br>ERSrcTAM04hr_chx_rep2:25.6<br>ERSrcTAM24hr_chx_rep2:26.8<br>EH_chx_rep1:7.9<br>EL_chx_rep1:16.7<br>ELR_chx_rep1:12.5<br>EH_harr_rep1:1.0<br>EL_harr_rep1:2.0<br>ELR_harr_rep1:1.2<br>EH_chx_rep2:6.3<br>EL_chx_rep2:19.7<br>ELR_chx_rep2:20.0<br>EH_harr_rep2:2.0<br>EL_harr_rep2:1.6<br>ELR_harr_rep2:6.1 | 316.5           | NM_019008.5:LOR8F8:100%     |
|         | Ensembl           | 22+39504230-39504443 | ATG   | uORF | 0.44        | 0.88       | 0      | ERSrcTAM00hr_chx_rep1:13.9<br>ERSrcTAM01hr_chx_rep1:14.9<br>ERSrcTAM04hr_chx_rep1:20.5                                                                                                                                                                                                                                                                                                                                                                                                                                                                                                                                                                                                | 316.4           | ENST00000325301:LOR8F8:100% |

[Contact us](#)

[Back](#)

### Can the translation of pseudogenes be detected?

Pseudogenes are by definition an imperfect copy of a functional gene. Thus, pseudogenes share a **high degree of homology with their related genes** and this may hinder their detection by ribosome profiling. Indeed, most of the footprints will multimap to the gene and the pseudogene since footprints are short fragments. OpenProt enforces a pipeline that may hinder pseudogene detection but that favour highly confident annotations. Thus, **a pseudogene may be detected with our pipeline only if unique footprints can be seen.**

[Back](#)

### I have ribosome profiling datasets that I would like to share with OpenProt, how can I do so?

We are constantly adding datasets to the OpenProt database. If you have some you would be willing to share with us, you can contact us [here](#).

[Back](#)

### TE (Translation Events) detection truths: recommendations

The OpenProt pipeline for ribosome profiling dataset analyses uses [PRICE algorithm](#). It is a model, and thus it may not always fully converge and use the same parameters. Therefore, we **encourage seeking detections across multiple datasets**. Similarly to mass spectrometry data, the more an ORF would have been identified in ribosome profiling datasets, the more confident we are.

In an effort to focus on highly confident translation event, we use a stringent 1 % FDR and a pipeline that may hinder detection of pseudogenes (see [above](#)). Furthermore, identifications are dependent on the quality of the study analyzed (signal to noise ratio, and sequencing depth). Some transcripts may not be seen at all in an experiment. Thus, it is important to remember that **an absence of detection does not mean an absence of translation.**

[Back](#)

## SUPPORTING MATERIALS S3

Help Materials for protein orthology analysis

- [What is an ortholog and a paralog?](#)
- [What is the InParanoid approach?](#)
- [How can I see if a protein is conserved?](#)
- [I found a novel protein but it is weakly conserved, is it a random ORF?](#)
- [Conservation analysis truths: recommendations](#)

### What is an ortholog and a paralog?

An **ortholog** is a protein sequence from a species that shares a high degree of homology with a protein sequence from another species. Two orthologous proteins are 2 **similar proteins** from **different species**. Thus, orthologs have a common ancestor gene and diverged by a **speciation** event.

A **paralog** is a protein sequence from a species that shares a high degree of homology with a protein sequence from a different gene within the same species. Two paralogous proteins are 2 **similar proteins** from **different genes** within **one species**. Thus, paralogs originate from a **duplication** event, creating a “copy” of an existing gene [36].

[Back](#)

### What is the InParanoid approach?

The InParanoid algorithm (PMID [25429972](#)) aims to identify ortholog and paralog groups. The algorithm consists of a all-vs-all Basic Local Alignment Search Tool (BLAST) comparison of all protein sequences in two species. For example, all proteins from *Homo sapiens* are BLAST searched against all proteins from *Pan troglodytes*. Several type of orthologies can be identified, all included in OpenProt : one-to-one corresponds to a pairwise best reciprocal hit (BRH); one-to-many corresponds to all orthologs to one query protein; many-to-one corresponds to all queries matching to one ortholog; and many-to-many corresponds to all orthologs to all queries. Secondly, the same can be done within one species to identify paralogs. OpenProt uses a significance filter at a bitscore of 40 for an overlap over 50 % of the query sequence, as previously published ([Samandi et al., eLife, 2017](#)). For more information on InParanoid algorithm, see PMID [25429972](#).

[Back](#)

### How can I see if a protein is conserved?

You can see on your search results species that contain orthologs across the 10 species currently supported by OpenProt (**1**). Species are abbreviated using a two letter code, the first letters of the species and sub-species names (for example, *Rattus norvegicus* is abbreviated RN). The darker the



blue colour, the more similar is the protein sequence from the ortholog in that species. All details for identified orthologs and paralogs can be found under the **details** tab.

OpenProt

Genome: Species: Homo sapiens, Assembly: GRCh38 p5 (GCA\_000001405.20), Annotation: Ensembl+RefSeq (Ensembl (GRCh38))

Gene: ECORADD, Transcript: list of transcript accessions, Protein: list of protein accessions

Advanced Search (edit search criteria)

Show only proteins with experimental evidence  Show only proteins detected by MS  Show only proteins detected by ribosome profiling studies

Show only proteins with predicted domains  Show any ADProts  Show any isoforms

Search: 13 proteins found

| Protein Accession?             | Protein Types? | Protein length (a.a.) | kDa   | pl    | MS? | TE? | Domains? | Orthology Across 10 Species #   Species Names? | Species      | Gene    | Transcript Accession | Type | Localization? |
|--------------------------------|----------------|-----------------------|-------|-------|-----|-----|----------|------------------------------------------------|--------------|---------|----------------------|------|---------------|
| 1 NP_542778.1 ENSP000003352320 | RefProt        | 205                   | 23.69 | 4.57  | 23  | 2   | 3        | 6                                              | Homo sapiens | EDARADD | NM_080738.3          | mRNA | -             |
| 2 IP_079312                    | AltProt        | 388                   | 42.34 | 5.71  | 72  | 0   | 16       | 9                                              | Homo sapiens | EDARADD | ENST00000359362      | mRNA | 3'UTR         |
| 3 ENSP00000335076 NP_665860.2  | RefProt        | 215                   | 24.80 | 5.04  | 22  | 0   | 3        | 6                                              | Homo sapiens | EDARADD | NM_145861.2          | mRNA | -             |
| 4 ENSP00000405815              | RefProt        | 84                    | 9.28  | 3.84  | 8   | 0   | 0        | 0                                              | Homo sapiens | EDARADD | NM_080738.3          | mRNA | 3'UTR         |
| 5 IP_079314                    | AltProt        | 40                    | 4.25  | 9.82  | 0   | 0   | 5        | 4                                              | Homo sapiens | EDARADD | NM_145861.2          | mRNA | -             |
| 6 IP_079316                    | AltProt        | 86                    | 9.35  | 10.33 | 0   | 0   | 1        | 3                                              | Homo sapiens | EDARADD | ENST00000359362      | mRNA | 3'UTR         |

Then, you can click on the **conservation** tab, that will display orthologs and paralogs. The number on the Conservation tab corresponds to the number of species with at least one identified ortholog, out of the 10 species currently supported by OpenProt.

OpenProt

back to main table

IP\_079312

Info Mass spectrometry (72) Translation (none) Domains (16) Conservation (9)

Homo sapiens / GRCh38.p5 chr 1:236,478,165-236,489,331

Genome: 236,478,000 - 236,489,000

Transcript (RefSeq (GRCh38.p7))

Protein (RefSeq (GRCh38.p7))

Peptide Detection (MS)

Powered by Biodaliance

Legend: Transcript (blue), RefProt (green), AltProt (red), Isoform (orange), RefProt peptide match (green), AltProt peptide match (red), Isoform peptide match (orange)

| Update browser                   | Gene    | Annotation | Genomic coordinates?  | Strand | Transcript      | Type  | ORF informations |         |                |                | Sequences                |             |
|----------------------------------|---------|------------|-----------------------|--------|-----------------|-------|------------------|---------|----------------|----------------|--------------------------|-------------|
|                                  |         |            |                       |        |                 |       | Frame ?          | Kozak ? | High-eff. TIS? | Localization ? | Transcript coordinates ? | Protein DNA |
| <input type="radio"/>            | EDARADD | GRCh38.p7  | 1:236483165-236484331 | +      | NM_080738.3     | mRNA  | 1                | -       | -              | 3'UTR          | 1348-2515                | show show   |
| <input type="radio"/>            | EDARADD | GRCh38.83  | 1:236483165-236484331 | +      | ENST00000359362 | mRNA  | 1                | -       | -              | 3'UTR          | 1348-2515                | show show   |
| <input checked="" type="radio"/> | EDARADD | GRCh38.p7  | 1:236483165-236484331 | +      | NM_145861.2     | mRNA  | 2                | -       | -              | 3'UTR          | 1229-2396                | show show   |
| <input type="radio"/>            | ENO1P1  | GRCh38.83  | 1:236483165-236484331 | +      | ENST00000366587 | ncRNA | 1                | -       | -              | -              | 1-1168                   | show show   |

The tree of orthologs and paralogs is then displayed. Orthologs and paralogs are separated in two trees (yellow node, 1). Then, orthologs for each species can be displayed or hidden by clicking on the species node (2). The size of the nodes relates to the number of orthologs, when the colour relates to the homology (identity percentage, 3).

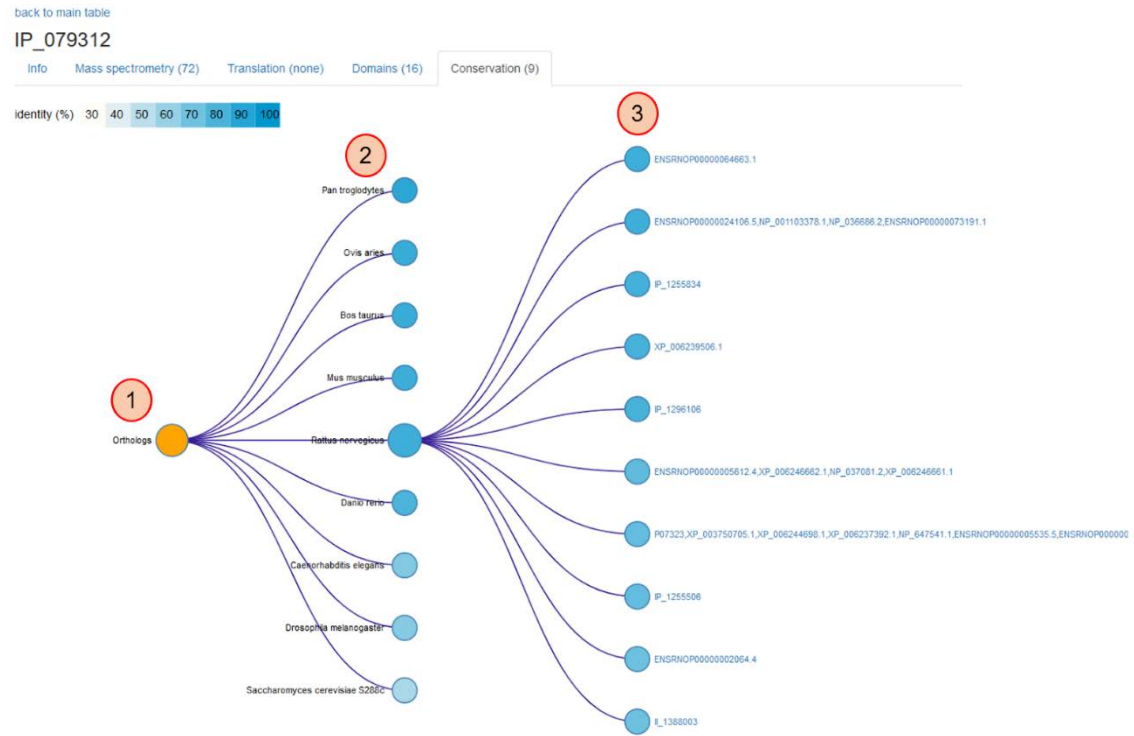

Details for each identified ortholog pair and paralog pair can be displayed by clicking on the **accession** key.

**Blast Output of IP\_079312 against IP\_1255506**

**1** Blast  
 Query: IP\_079312 (Homo sapiens)  
 Subject: **IP\_1255506** (Rattus norvegicus) **3** **4**

| pident | length | mismatch | gapopen | qstart | qend | sstart | send | eval   | bitscore | qcovs | qlen | slen |
|--------|--------|----------|---------|--------|------|--------|------|--------|----------|-------|------|------|
| 73.43  | 207    | 51       | 1       | 97     | 303  | 1      | 203  | 2e-104 | 312      | 53    | 388  | 216  |

**2** Reciprocal Blast  
 Query: IP\_1255506 (Rattus norvegicus)  
 Subject: IP\_079312 (Homo sapiens)

| pident | length | mismatch | gapopen | qstart | qend | sstart | send | eval   | bitscore | qcovs | qlen | slen |
|--------|--------|----------|---------|--------|------|--------|------|--------|----------|-------|------|------|
| 73.43  | 207    | 51       | 1       | 1      | 203  | 97     | 303  | 3e-104 | 312      | 94    | 216  | 388  |

**5** Close

**4** **5** **IP\_1255506** (highlighted with red circle and arrow)

Both the BLAST (1) and reciprocal BLAST (inverted query species, 2) results are displayed. Notably of interest, the bitscore (3) and the query sequence coverage (qcovs, 4) are displayed. The identity percentage is indicated as well (pident, 5). Finally, by clicking on the blue marked accession of the identified ortholog from the pop-up window, one can directly access the details tab to that specific protein (in the above example IP\_1255506 in *Rattus norvegicus*).

[Back](#)

### **I found a novel protein but it is weakly conserved, is it a random ORF?**

A **lack of conservation does not necessarily mean the ORF is random**. Several studies showed that *de novo* genes rise up from short ORFs (PMID [29556078](#)) not conserved across species. Furthermore, transcriptome annotation is more thorough in human than in other species. This can lead to an apparently weakly conserved sequence, which is in fact due to poorer transcriptome annotations in other species.

[Back](#)

### **Conservation analysis truths: recommendations**

AltProts have a **median length of 45 amino acids**, much shorter than the 460 amino acids of RefProts. This is to keep in mind when looking at orthology, and this directed our choice of threshold (see [above](#)). It is possible one ortholog passes the filter when the homology rely only on a conserved functional domain. However, such cases would always have a bitscore close to the threshold of 40. That is why we always encourage users to **look at the protein sequences, their alignment and scores**. These can be found by clicking on the accession key of identified orthologs and/or paralogs (see [above](#)).

OpenProt currently does not account for **outparalogs**. For example, should a gene undergo a duplication event in a distant species, all protein sequences derived from the original and the “copy” genes will be identified as orthologs from another species when they actually make up separate ortholog groups. That is why we encourage for **careful exploration of OpenProt** conservation data for each candidate of interest.

[Back](#)
